# Supplementary material for: Differential expression of miR-4492 and IL-10 is involved in chronic rhinosinusitis with nasal polyps
Source: PubMed Central journal article supplement — Exp Ther Med. 2019 Sep 18;18(5):3968–76. doi: 10.3892/etm.2019.8022 (PMC6781800; doi:10.3892/etm.2019.8022), 2019-09-18

Figure S1. Quality control of the RNA samples for reverse transcription-quantitative polymerase chain reaction validation. The RNA samples were analyzed using agarose gel electrophoresis. The 26 samples that were of low quality are indicated by the red boxes. M, marker.

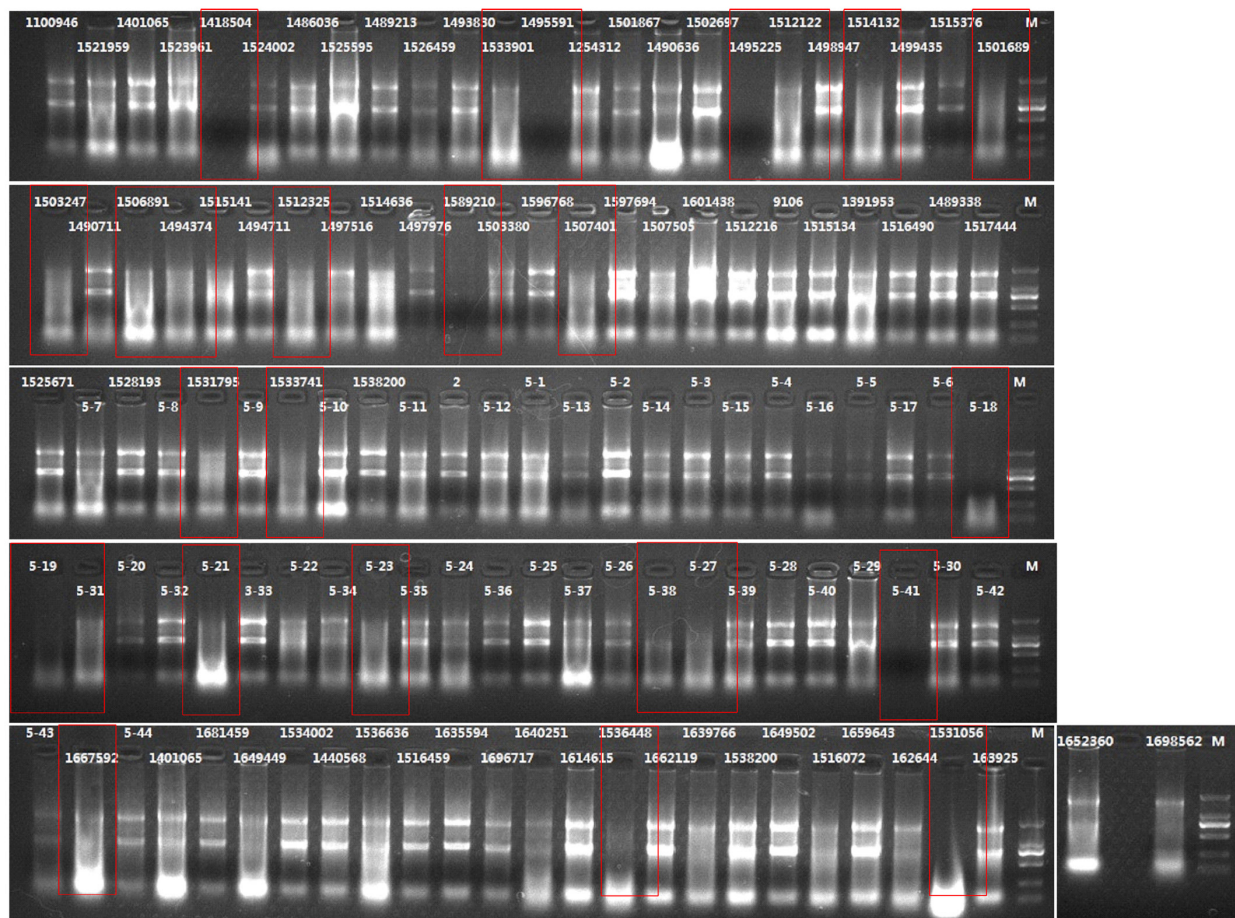

Supplement: Supplementary_Data.pdf [file Supplementary_Data.pdf]
